# Supplementary material for: Ferrostatin-1 post-treatment attenuates acute kidney injury in mice by inhibiting ferritin production and regulating iron uptake-related proteins
Source: PeerJ journal article supplement (doi:10.7717/peerj.15786), 2023-09-08
Supplement: figure1.zip [file figure1.zip]

## Sheet: Sheet1
Figure 1B
	sham	CLP	Fer-1
ROS intensity(% of sham)	166.69	420.54	194.04
	150	428.98	195.48
	147.65	405.28	188.46
	137.68	403.44	216.97
	135.75	434.27	184.42
	155.44	389.25	203.01
	140.9	370	209.77
	151.23	360.8	199.4
	147.77	410.23	193.58
Figure 1C
	sham	CLP	Fer-1
BUN mmol/l	8.3	33.04	13.3
	8.95	30.74	11.15
	9.52	32.97	13.47
	10.97	34.23	12.75
	9.44	35.4	9.64
	9.19	36.37	11.16
	9.66	35.11	11.92
	9.09	35.57	13.25
	10.04	36.64	12.1
Figue 1D
	sham	CLP	Fer-1
Cr μmol/l	52.94	148.19	66.34
	51.17	149.88	67.44
	51.97	144.32	71.46
	51.33	143.19	63.98
	48.1	152.83	63.97
	48.55	142.78	65.72
	46.85	137.74	68.28
	47.76	146.46	63.14
	49.06	153.88	67.3
Figure 1E
	sham	CLP	Fer-1
MDA in kidney(nmol/mg prot)	4.95	15.21	9.17
	4.9	14.42	8.77
	4.7	14.08	9.38
	4.86	13.6	8.4
	5	14.39	9.16
	4.6	14.67	9.19
