# Supplementary material for: Ferrostatin-1 post-treatment attenuates acute kidney injury in mice by inhibiting ferritin production and regulating iron uptake-related proteins
Source: PeerJ journal article supplement (doi:10.7717/peerj.15786), 2023-09-08
Supplement: figure2.zip [file figure2.zip]

## Sheet: Sheet1
Figure 2A
	sham	CLP	Fer-1
GPX4 gene expression	0.82	0.12	0.65
	0.6	0.23	0.63
	0.98	0.3	1.03
	0.94	0.17	0.31
	0.7	0.32	0.51
	1.17	0.36	0.53
	0.59	0.35	0.46
	0.8	0.29	0.53
	0.97	0.3	0.18
Figure 2B
	sham	CLP	Fer-1
SLC7A11 gene expression	1.24	0.66	0.93
	1.25	0.7	0.72
	1.26	0.51	0.81
	1.24	0.59	0.82
	1.26	0.53	0.89
	1.25	0.48	0.86
	1.26	0.48	0.73
	1.22	0.61	0.75
	1.26	0.59	0.75
Figure 2C
	sham	CLP	Fer-1
NRF2 gene expression	1.24	0.87	0.77
	1.25	0.6	1.01
	1.26	0.77	0.89
	1.24	0.68	0.95
	1.26	0.68	1
	1.25	0.73	1.08
	1.26	0.68	1.17
	1.22	0.6	1.07
	1.26	0.62	0.9
Figure 2D
	sham	CLP	Fer-1
FTH1 gene expression	0.96	0.37	0.61
	0.94	0.37	0.6
	0.95	0.39	0.6
	0.97	0.38	0.61
	0.95	0.36	0.61
	0.96	0.38	0.59
	0.95	0.38	0.59
	0.96	0.37	0.59
	0.97	0.37	0.61
Figure 2F
	sham	CLP	Fer-1
GPX4 protein expression	1	0.2	0.6
	1	0.4	0.58
	1	0.3	0.48
	1	0.28	0.56
	1.01	0.35	0.51
	1.1	0.31	0.52
	1.15	0.44	0.55
	1.04	0.39	0.6
	1.08	0.38	0.54
Figure 2G
	sham	CLP	Fer-1
SLC7A11 protein expression	1	0.4	0.65
	1.2	0.41	0.62
	1.3	0.42	0.63
	1	0.44	0.51
	1	0.45	0.53
	1	0.5	0.58
	1.15	0.48	0.59
	1.1	0.46	0.6
	1.16	0.43	0.62
Figure 2H
	sham	CLP	Fer-1
NRF2 protein expression	0.96	0.47	0.7
	1	0.48	0.69
	0.89	0.46	0.7
	0.84	0.39	0.61
	0.88	0.48	0.62
	0.79	0.49	0.66
	0.98	0.45	0.59
	0.94	0.48	0.62
	0.82	0.49	0.65
Figure 2I
	sham	CLP	Fer-1
FTH1 proteion expression	1.3	0.51	0.8
	1	0.48	0.75
	1.26	0.46	0.7
	1	0.39	0.82
	1	0.52	0.8
	1.2	0.5	0.76
	1	0.5	0.8
	1	0.51	0.7
	1.18	0.5	0.8
