# Supplementary material for: Ferrostatin-1 post-treatment attenuates acute kidney injury in mice by inhibiting ferritin production and regulating iron uptake-related proteins
Source: PeerJ journal article supplement (doi:10.7717/peerj.15786), 2023-09-08
Supplement: figure3.zip [file figure3.zip]

## Sheet: Sheet1
Figure 3B
	Con	LPS	Fer-1
ROS intensity(% of Con)	124.07	306.33	128.08
	123.5	303.69	125.26
	124.96	304.79	130.38
	123.66	296.74	137.37
	125.35	287.04	139.93
	123.12	297.68	131.1
	123.45	315.96	130.55
	124.11	303.63	132.32
	124.95	325.3	131.84
Figure 3C
	Con	LPS	Fer-1
GPX4 gene expression	0.93	0.33	0.65
	0.91	0.4	0.68
	0.92	0.36	0.67
	0.92	0.42	0.61
	0.94	0.38	0.74
	0.91	0.32	0.65
	0.92	0.36	0.77
	0.92	0.5	0.77
	0.91	0.45	0.77
Figure 3D
	Con	LPS	Fer-1
SLC7A11 gene expression	1.69	0.54	0.94
	1.5	0.52	0.87
	1.38	0.49	0.96
	1.5	0.46	0.88
	1.46	0.49	0.91
	1.52	0.53	0.94
	1.55	0.55	0.95
	1.78	0.53	0.87
	1.44	0.57	0.95
Figure 3E
	Con	LPS	Fer-1
NRF2 gene expression	1.23	0.54	0.94
	1.27	0.52	0.87
	1.26	0.49	0.96
	1.26	0.46	0.88
	1.25	0.49	0.91
	1.26	0.53	0.94
	1.25	0.55	0.95
	1.25	0.53	0.87
	1.23	0.57	0.95
Figure 3F
	Con	LPS	Fer-1
FTH1 gene expression	0.91	0.49	0.54
	0.92	0.48	0.68
	0.91	0.49	0.51
	0.91	0.49	0.51
	0.9	0.49	0.6
	0.9	0.5	0.63
	0.89	0.5	0.55
	0.9	0.49	0.58
	0.91	0.49	0.59
Figure 3H
	Con	LPS	Fer-1
GPX4 protein expression	0.8	0.38	0.6
	0.82	0.37	0.55
	0.75	0.39	0.56
	0.78	0.38	0.52
	0.76	0.39	0.53
	0.71	0.35	0.51
	0.81	0.34	0.53
	0.76	0.33	0.51
	0.77	0.32	0.48
Figure 3I
	Con	LPS	Fer-1
SLC7A11 protein expression	1.15	0.38	0.62
	1.11	0.58	0.62
	1.08	0.33	0.54
	0.98	0.42	0.53
	1.3	0.49	0.62
	1.24	0.38	0.6
	1.21	0.36	0.56
	1.24	0.53	0.56
	1.11	0.42	0.67
Figure 3J
	Con	LPS	Fer-1
NRF2 protein expression	1.1	0.5	0.7
	1	0.51	0.71
	1	0.48	0.72
	1	0.56	0.8
	1	0.57	0.75
	1.1	0.6	0.75
	1	0.58	0.78
	0.95	0.55	0.7
	0.9	0.46	0.68
Figure 3K
	Con	LPS	Fer-1
FTH1 proteion expression	1.1	0.6	0.8
	1	0.61	0.81
	1	0.62	0.82
	1	0.6	0.8
	1	0.57	0.79
	1.15	0.57	0.75
	1	0.58	0.78
	0.95	0.6	0.8
	1	0.6	0.8
